# Supplementary material for: Interventions can improve patient experienced quality of care in transitions between healthcare settings: A scoping review.
Source: Research Square preprint supplement (doi:10.21203/rs.3.rs-4212287/v1), 2024-04-12
Supplement: Supplementary file [file 3e313d9a7623a42cc4b11471.pdf]

## Appendix 1- Extraction template

### General information

- Title
- Author(s)
- Year of publication
- Country of origin (list of countries to cross of which)

### Characteristics of included studies

- Methods
  - Aim/purpose/research question(s)
  - Study design (list of all the different study designs to cross of which)
  - Intervention/implemented service/change in procedure
- Participants
  - Population description
  - Inclusion criteria
  - Exclusion criteria
  - Number of participants
- Outcomes/phenomena of interest
  - What were they?
  - How were they collected? (list of collection methods to cross of)
  - How were they measured or analyzed? (list of measurement/analysis methods to cross of)
- Key findings
  - Qualitative findings
  - Quantitative findings
